# Supplementary material for: PGC-1α Induces Human RPE Oxidative Metabolism and Antioxidant Capacity
Source: PubMed Central journal article supplement — Invest Ophthalmol Vis Sci. 2016 Mar 8;57(3):1038–51. doi: 10.1167/iovs.15-17758 (PMC4788093; doi:10.1167/iovs.15-17758), 2016-03-08
Supplement: i1552-5783-57-3-1038-s01.pdf [file i1552-5783-57-3-1038-s01.pdf]

# Supplemental Figure 1

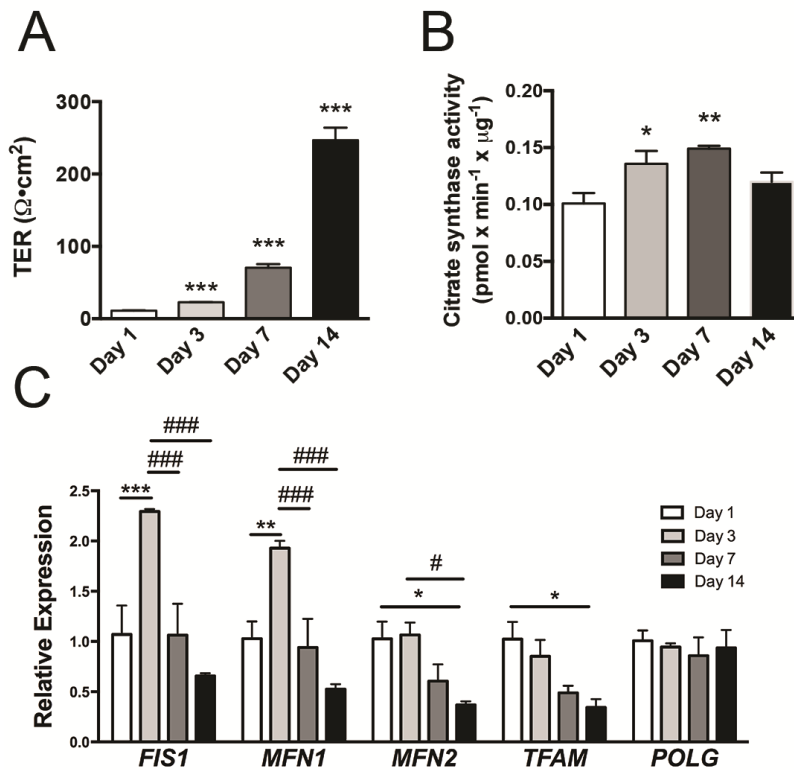

Supplemental Figure 1. Changes in barrier function, mitochondrial content and mitochondrial dynamics gene expression during hfRPE maturation. (A) TER of hfRPE cultured on transwells for up to 14 days (n=36 transwells from 3 independent cell isolations). (B) Citrate synthase activity of 3 independent hfRPE cultures matured for up to 14 days (n=3 per time point). (C) Gene expression of mitochondrial dynamic genes measured by qPCR during hfRPE maturation. (D) Gene expression of antioxidant genes measured by qPCR during hfRPE maturation (\* $P < 0.05$ ; \*\*\* $P < 0.001$  vs 1 day, ANOVA followed by Dunnett's multiple comparison test).

## Supplemental Figure 2

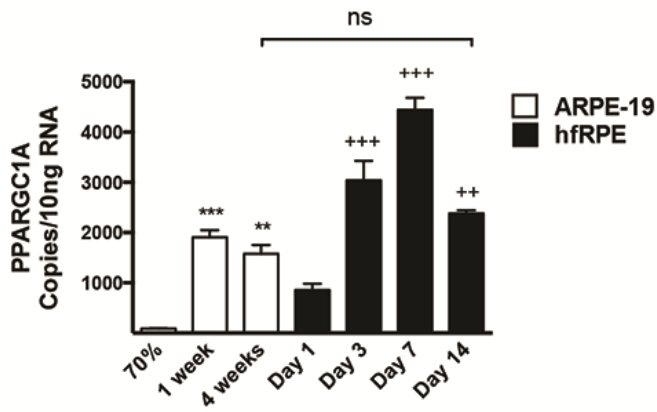

Supplemental Figure 2. Absolute quantification of *PPARGC1A* mRNA copies in ARPE-19 and hfRPE during in vitro maturation (n=3 each group; \*: statistical analysis of the values obtained for ARPE-19 compared to 70%; +: statistical analysis of the values obtained for hfRPE compared to 1 day; ns: no statistical significance found between ARPE-19 and hfRPE at the end of the maturation process, 4 weeks and 14 days respectively).

# Supplemental Figure 3

## A

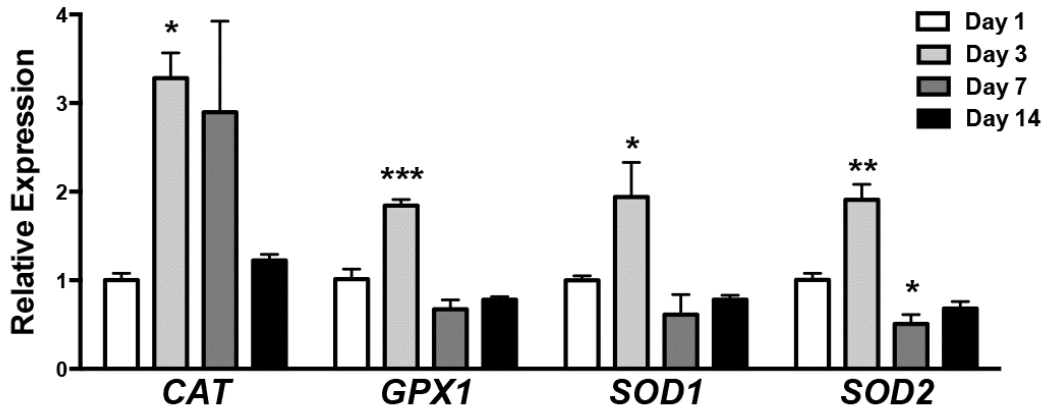

## B

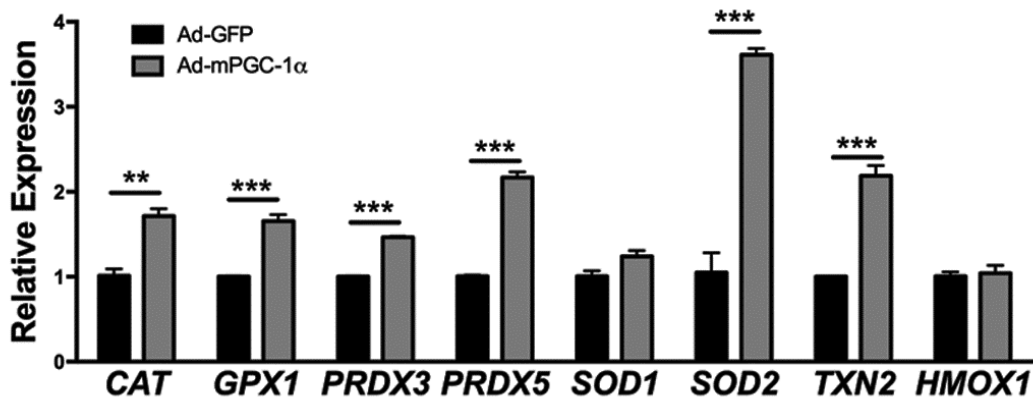

Supplemental Figure 3. Changes in antioxidant gene expression during hfrPE maturation and following mPGC-1 $\alpha$  overexpression. (A) Gene expression of antioxidant genes measured by qPCR during hfrPE maturation (n=3; \* $P$ <0.05; \*\* $P$ <0.01; \*\*\* $P$ <0.001 vs 1 day, ANOVA followed by Dunnett's multiple comparison test). (B) Effect of mPGC-1 $\alpha$  overexpression on antioxidant enzymes expression in hfrPE (n=3 each group; \*\* $P$ <0.01, \*\*\* $P$ <0.001).
